# Supplementary material
Source: HighWire-hosted journal article supplement (https://erj.ersjournals.com/content/55/3/1901947)
Supplement: inline-supplementary-material-1 [file inline-supplementary-material-1.pdf]

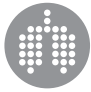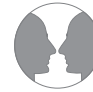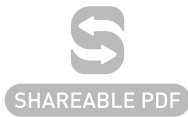

# FEV<sub>1</sub> and MRI ventilation defect reversibility in asthma and COPD

Hana Serajeddini<sup>1,2,4</sup>, Rachel L. Eddy<sup>1,3,4</sup>, Christopher Liciskai<sup>2</sup>, David G. McCormack<sup>2</sup> and Grace Parraga<sup>1,2,3</sup>

**Affiliations:** <sup>1</sup>Robarts Research Institute, Western University, London, ON, Canada. <sup>2</sup>Division of Respiriology, Dept of Medicine, Western University, London, ON, Canada. <sup>3</sup>Dept of Medical Biophysics, Western University, London, ON, Canada. <sup>4</sup>Contributed equally as first authors.

**Correspondence:** Grace Parraga, Robarts Research Institute, 1151 Richmond St N, London, Canada, N6A 5B7. E-mail: gparraga@robarts.ca

 @ERSpublications

**MRI ventilation defect post-bronchodilator reversibility was not always concordant with FEV<sub>1</sub> reversibility in asthma and COPD. MRI VDP may provide enhanced sensitivity to small airway response to inhaled medication.** <http://bit.ly/2qKnwID>

**Cite this article as:** Serajeddini H, Eddy RL, Liciskai C, *et al.* FEV<sub>1</sub> and MRI ventilation defect reversibility in asthma and COPD. *Eur Respir J* 2020; 55: 1901947 [<https://doi.org/10.1183/13993003.01947-2019>].

This single-page version can be shared freely online.

## *To the Editor:*

The underlying pathophysiological determinants of asthma and COPD are related in complex ways. Importantly however, post-bronchodilator forced expiratory volume in 1 s (FEV<sub>1</sub>) reversibility may occur in approximately 50% of COPD patients [1], whilst epidemiological [2] and magnetic resonance imaging (MRI) studies [3] suggest that, in asthma patients, FEV<sub>1</sub> reversibility may diminish over time. As compared to patients with asthma or COPD alone, patients with co-existing asthma and COPD report worse clinical outcomes [4] and increased healthcare costs [5] and burden [4, 5].
